# Supplementary material for: Imprinted expression in cystic embryoid bodies shows an embryonic and not an extra-embryonic pattern
Source: PubMed Central journal article supplement (PMC4454777; doi:10.1016/j.ydbio.2015.04.010), 2015-06-15
Supplement: mmc1.pdf [file mmc1.pdf]

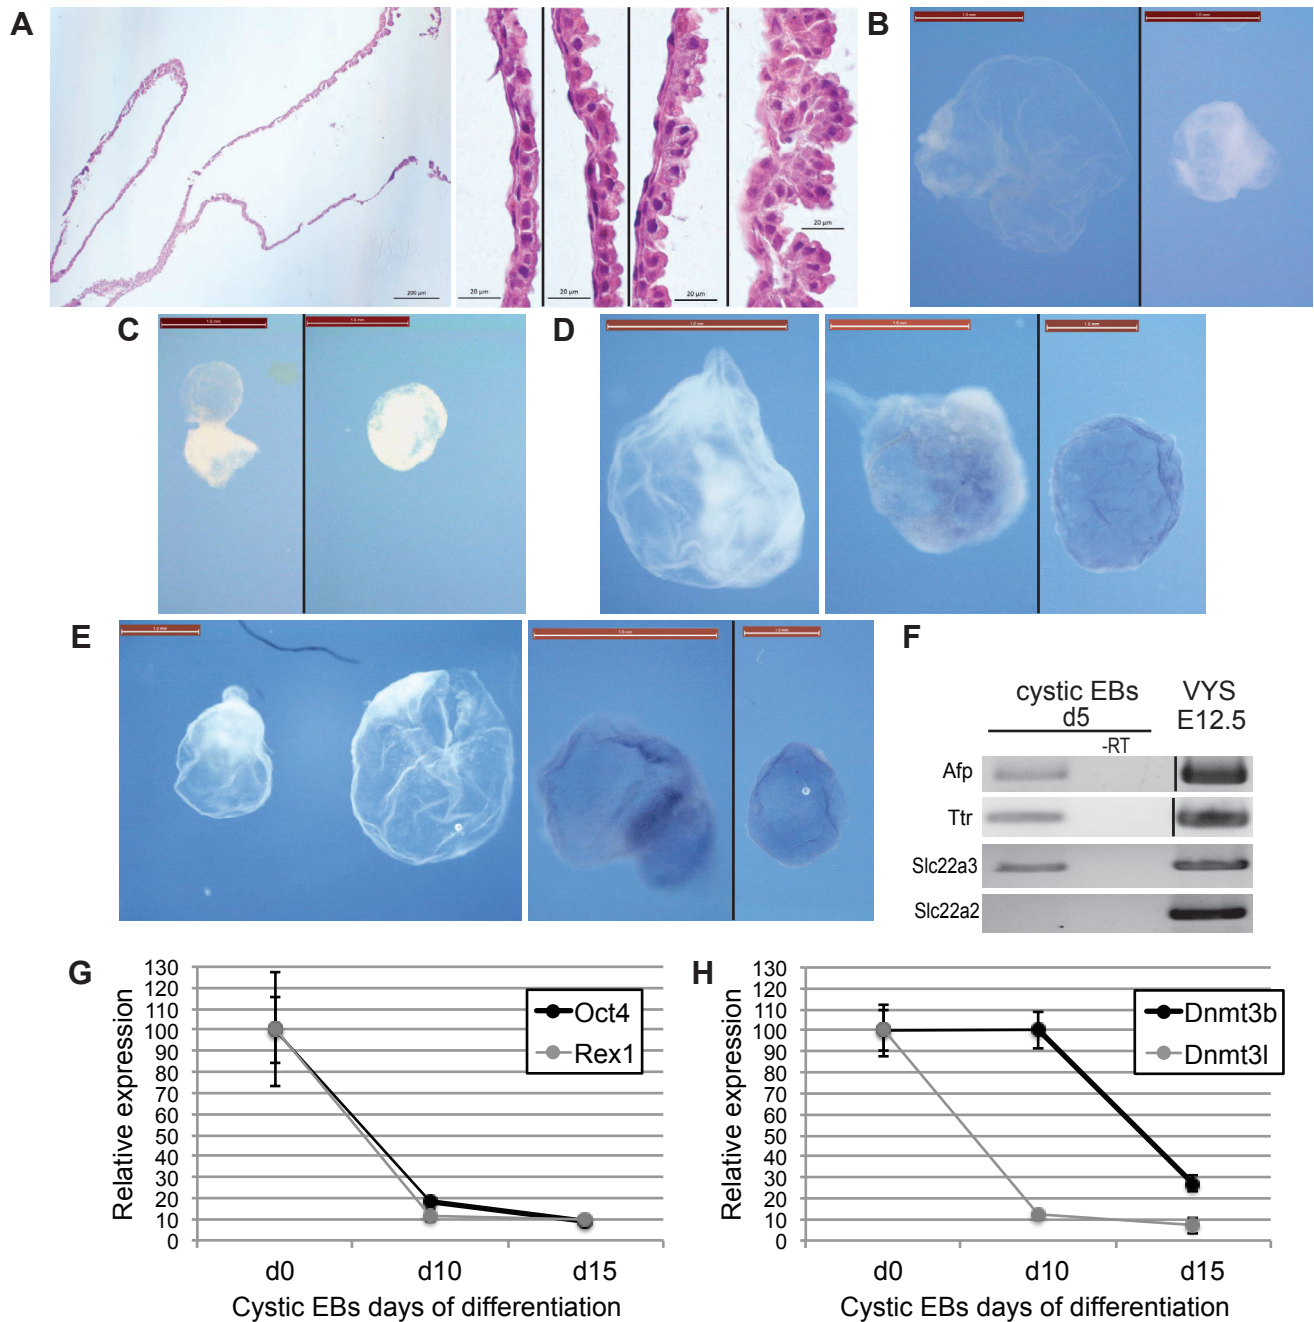

**Figure. S1. The histology of visceral yolk sac (VYS) and detection of marker expression in cystic embryoid bodies (EBs) by in situ hybridization, RT-PCR and RT-qPCR.** (A) Histological section of E12.5 VYS stained with Haematoxylin & Eosin showing a double layer organization with a columnar epithelium outer endoderm layer and inner mesoderm layer (scale bar left: 200 $\mu$ m, right: 20 $\mu$ m). No signal for an Afp sense probe (B) or a Ttr sense probe (C) was detected in cystic EBs by whole mount in situ hybridization (negative controls for Fig. 1G). Lefty1 (D) and Pyy (E) expression was detected in cystic EBs by whole mount in situ hybridization using antisense probes (right panels), whereas no signal was detected using sense probes (left panels). Scale bar for whole mount in situ hybridisations: 1mm. (F) EBs differentiated for 5 days with the cystic EB protocol showed expression of *Afp*, *Ttr*, and *Slc22a3* but not the specific yolk sac endoderm marker *Slc22a2* by RT-PCR, whereas E12.5 VYS showed expression of all markers. Primers for RT-PCR are given in Table S4. (G) Relative expression of the pluripotency markers *Oct4* and *Rex1* during cystic EB differentiation detected by RT-qPCR. (H) Relative expression of the *de novo* DNA methyltransferases *Dnmt3b* and *Dnmt3l* during cystic EB differentiation detected by RT-qPCR. The cystic EB differentiation series assayed in G and H was differentiated from A9 p17 ES cells and expression levels were normalised to cyclophilin A. Error bars indicate the standard deviation of 3 technical replicates. Primers for RT-qPCR are detailed in Santoro et al 2013 Development 140, 1184-1195.

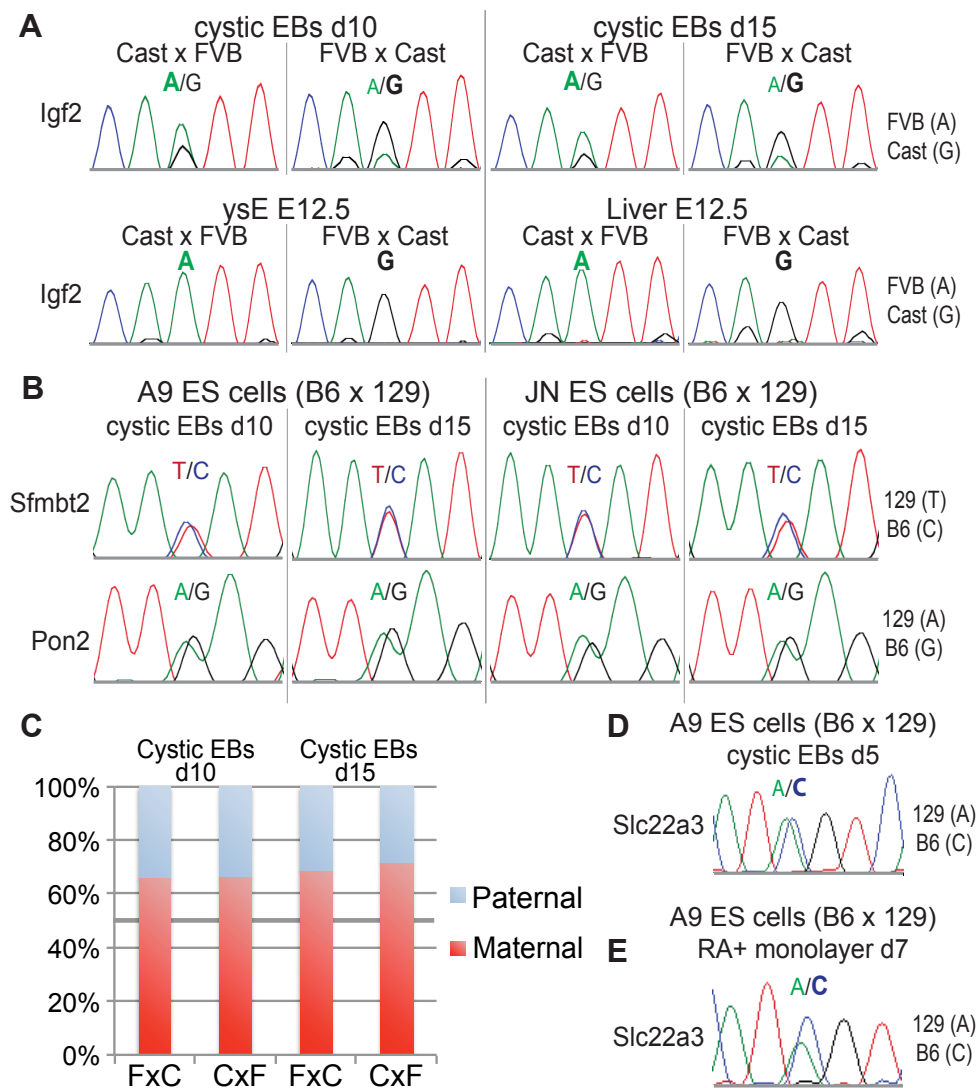

**Figure S2. Extra-embryonic lineage (EXEL) specific imprinted gene expression in cystic embryoid bodies (EBs).** (A) Sanger sequencing chromatograms of *Igf2* showed biased reciprocal expression in cystic EBs differentiated for 10 and 15 days (top), while E12.5 yse and liver showed full imprinted expression (bottom) using FVB and Cast reciprocal crosses. (B) Sanger sequencing chromatograms of *Sfmtb2* and *Pon2* showed biallelic expression in cystic EBs differentiated for 10 and 15 days (AW\_A9 and JN cell lines with a F1 C57Bl/6 x 129SV background). (C) Quantification of the maternal bias observed in the sequencing tracks from Sanger sequencing chromatograms for *Slc22a3* (Fig. 2D top row) using the Mutation Surveyor® software. (D) Sanger sequencing chromatogram showing biallelic expression of *Slc22a3* at d5 of cystic EB differentiation. (E) Sanger sequencing chromatogram showing a moderate maternal biased expression of *Slc22a3* in ES cells differentiated for 7 days as a monolayer with 0.27  $\mu$ M retinoic acid, similar to the bias observed for cystic EBs (AW\_A9 cell line with a F1 C57Bl/6 x 129SV background).

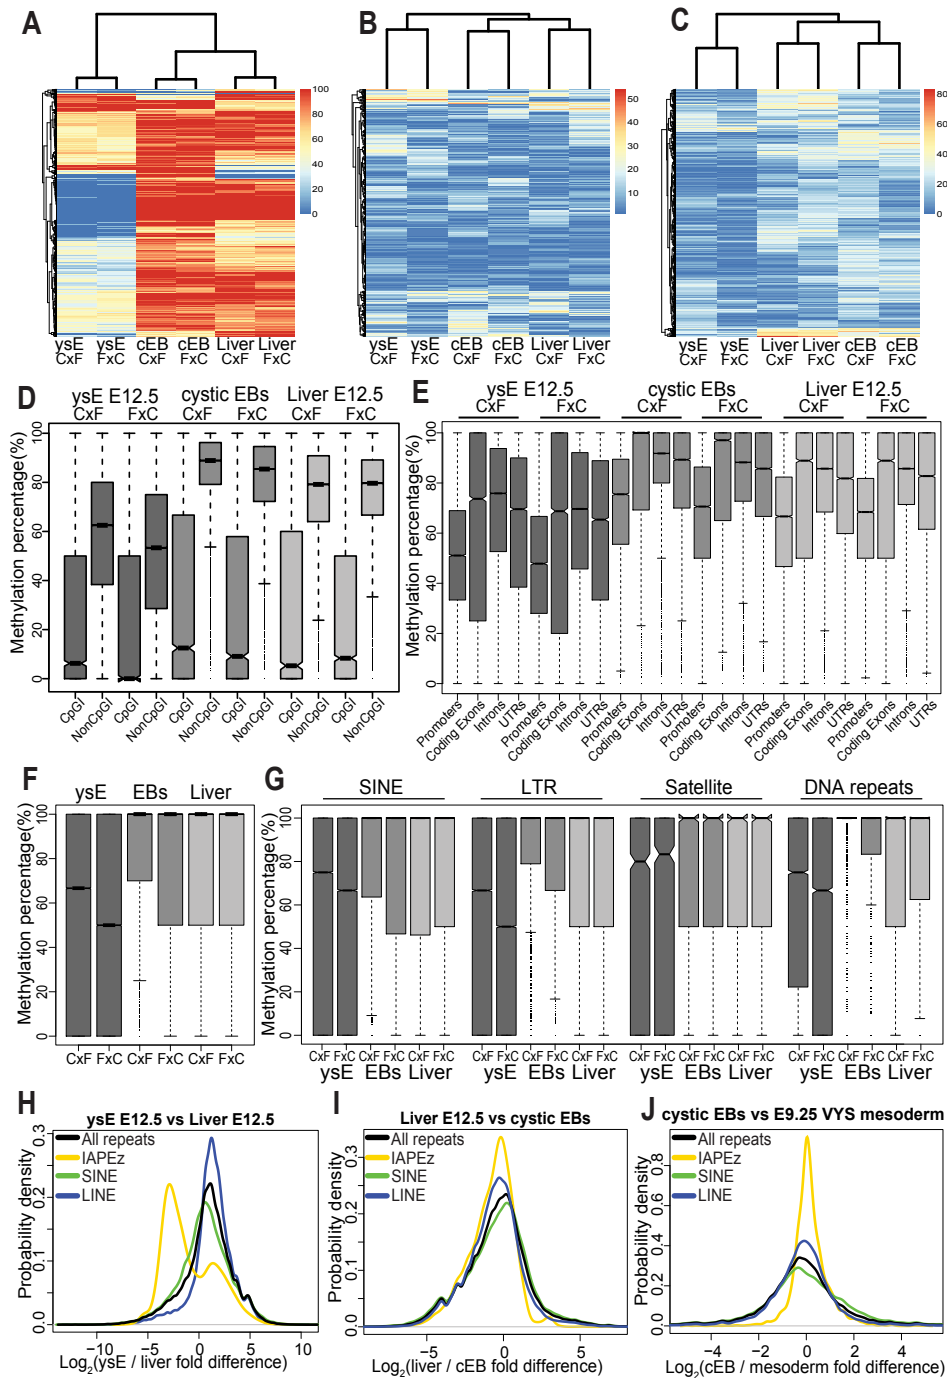

**Figure S3. Cystic embryoid bodies (EBs) show epigenetic features more similar to fetal liver than yolk sac endoderm (ysE).** (A) Hierarchical clustering of E12.5 ysE, cystic EBs and E12.5 liver by the methylation of all repeats (filtered as described in supplementary methods resulting in 1970 measurements). (B) Hierarchical clustering of E12.5 ysE, cystic EBs and E12.5 liver by the methylation of CpG islands (filtered as described in supplementary methods resulting in 972 measurements). (C) Hierarchical clustering of E12.5 ysE, cystic EBs and E12.5 liver by the methylation of promoters defined as 5kb regions centered around the transcriptional start site of RefSeq transcripts (filtered as described in supplementary methods resulting in 2568 measurements). (D) Boxplots indicating the methylation levels of CpG islands and the non-CpG island parts of the genome (analyzed in non-overlapping 5kb windows) in two replicates of E12.5 ysE, cystic EBs and E12.5 liver. (E) Boxplots indicating the methylation levels of genic structures (promoters, coding exons, introns and 5' + 3' UTRs) in two replicates of E12.5 ysE, cystic EBs and E12.5 liver. (F) Boxplots indicating methylation levels of all repeats in two replicates of E12.5 ysE, cystic EBs and E12.5 liver. (G) Boxplot illustrating the methylation levels of SINE, LTR, Satellite and DNA repeat families in two replicates of E12.5 ysE, cystic EBs and E12.5 liver. (H-J) Kernel density plots showing the probability of repeats showing a fold difference expression in the two compared tissues (x-axis:  $\log_2$  fold difference between two tissues, y-axis: probability density). (H) IAPEz repeats are highly expressed in E12.5 ysE compared to E12.5 liver, whereas other repeat classes show no significant difference in expression. (I) No repeat classes showed a significant difference in expression between E12.5 liver and cystic EBs. (J) No repeat classes showed a significant difference in expression between cystic EBs and E9.25 VYS mesoderm.

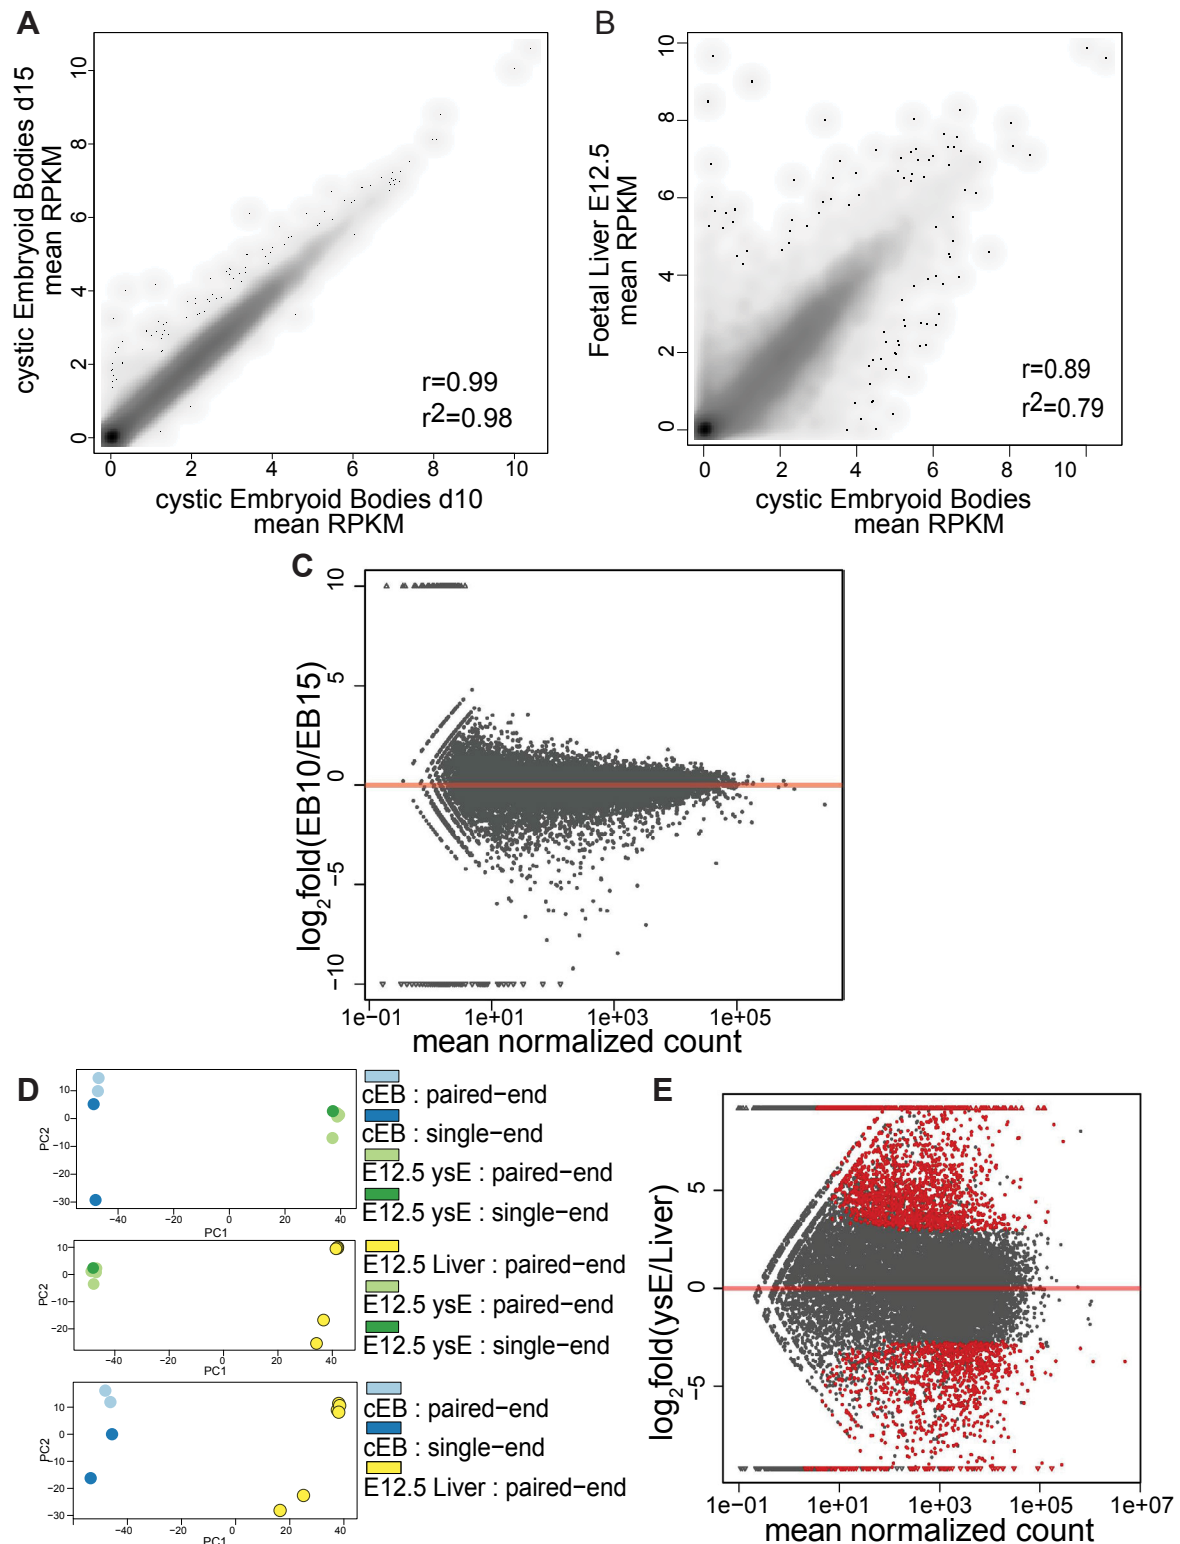

**Figure S4. Differential gene expression analysis shows different stages of cystic embryoid body (EB) differentiation are similar whereas yolk sac endoderm and liver show many differences.** (A) Cystic EBs differentiated for 10 days (d10, n=2) and 15 days (d15, n=2) show a strong correlation ( $r^2=0.98$ ) in density representation scatter plots of mean RPKM values from RNA-seq. (B) In contrast, cystic EBs differentiated for 10 or 15 days (n=4) are less correlated with fetal liver (n=6) in density representation scatter plots of mean RPKM values from RNA-seq. (C) An MA plot ( $\log_2$  fold change versus  $\log_{10}$  mean expression) of differentially expressed transcripts identified between cystic EBs d10 and d15 shows no significant differences with a FDR cut-off of  $<0.05$ . A negative change represents the transcripts expressed higher in cystic EBs d15 and a positive change represents transcripts expressed higher in cystic EB d15. (D) A principal component analysis scatterplot shows that samples cluster according to tissue type with a minor batch affect according to RNA-seq technique. Data points are colour-coded according to the tissues type and shaded according to the sequencing technique. (E) An MA plot of differentially expressed transcripts identified in E12.5 ysE and liver. Genes showing a significant difference are coloured red (FDR  $<0.01$ ). A negative change represents the transcripts expressed higher in cystic EBs and a positive change represents transcripts expressed higher in E12.5 ysE.

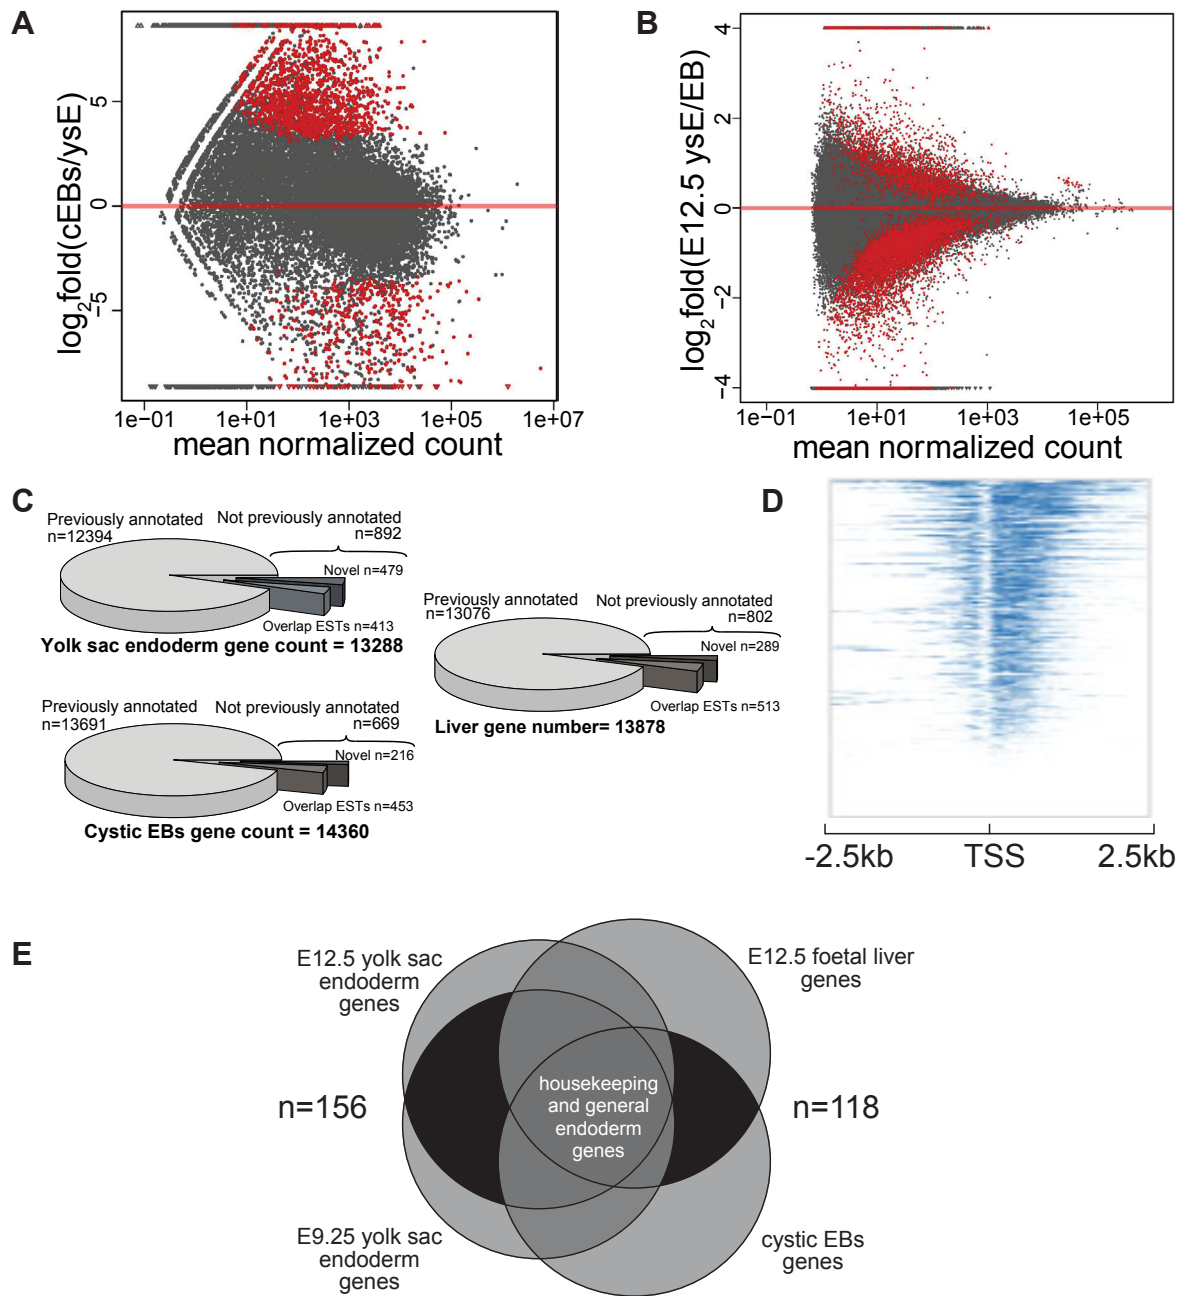

**Figure S5. Transcriptome analysis of yolk sac endoderm (ysE) cystic embryoid bodies (EBs) and fetal liver.** (A) An MA plot ( $\log_2$  fold change versus  $\log_{10}$  mean expression) of differentially expressed transcripts identified between E12.5 ysE and cystic EBs. A negative change represents the transcripts expressed higher in cystic EBs and a positive change represents the transcripts expressed higher in E12.5 ysE. Genes showing a significant difference are coloured red (FDR <0.01). (B) An MA plot ( $\log_2$  fold change versus  $\log_{10}$  mean expression) of differentially used exons identified between yolk sac endoderm and cystic EBs. A negative change indicates the exons used more in E12.5 ysE and a positive change represents the exons used more in cystic EBs. Exons showing a significant difference are coloured red (FDR <0.01). (C) Statistics of de novo gene locus annotations highlighting the putative novel genes identified in the sequenced tissues. (D) H3K4me3 enrichment validates de novo annotation of the ysE transcriptome. Heat map of H3K4me3 enrichment from E12.5 VYS ChIP-seq in a 5kb window centred over the predicted TSS from the de novo annotation from E12.5 ysE. (E) A Venn diagram illustrating the approach used in Fig. 5B to identify differentially expressed genes that distinguish ysE and cystic EBs (not to scale). Highlighted in black are the 156 genes expressed significantly higher in both E9.25 and E12.5 ysE compared to cystic EBs and fetal liver, and the 118 genes expressed higher in both cystic EBs and fetal liver compared to ysE. Values for E12.5 ysE and cystic EBs for these genes are given in Table S2.

**Table S1. Differential expression between E12.5 ysE and cystic EBs for 272 genes that distinguish E9.5 and E12.5 ysE from cystic EBs and fetal liver.**

| Genes expressed differentially higher in E12.5 ysE than in cystic EBs (156 genes) |                      |                      |             |          |         |               |
|-----------------------------------------------------------------------------------|----------------------|----------------------|-------------|----------|---------|---------------|
| RefSeq ID                                                                         | ysE mean read counts | EBs mean read counts | fold change | P val    | padj    | gene name     |
| NM_001111293                                                                      | 796.7                | 0.0                  | 0.00E+00    | 5.81E-12 | 7.1E-09 | Xlr5b         |
| NM_053165                                                                         | 10743.3              | 12.6                 | 1.17E-03    | 8.98E-12 | 8.7E-09 | Clec2h        |
| NM_001033879                                                                      | 2733.8               | 2.0                  | 7.23E-04    | 1.12E-11 | 9.8E-09 | Tubal3        |
| NM_133977                                                                         | 2307265.1            | 1956.7               | 8.48E-04    | 1.09E-11 | 9.8E-09 | Trf           |
| NM_007994                                                                         | 27599.8              | 49.6                 | 1.80E-03    | 9.71E-11 | 4.6E-08 | Fbp2          |
| NM_001161667                                                                      | 13171.2              | 9.8                  | 7.46E-04    | 2.12E-10 | 8.0E-08 | Acox2         |
| NM_053115                                                                         | 12952.1              | 10.2                 | 7.86E-04    | 3.16E-10 | 1.0E-07 | Acox2         |
| NM_025325                                                                         | 10050.1              | 15.9                 | 1.58E-03    | 3.51E-10 | 1.1E-07 | Haoa          |
| NM_133862                                                                         | 176282.0             | 539.7                | 3.06E-03    | 1.13E-09 | 2.6E-07 | Fgg           |
| NM_001165925                                                                      | 440.0                | 0.4                  | 8.76E-04    | 1.23E-09 | 2.8E-07 | Cldn14        |
| NM_001165926                                                                      | 509.0                | 0.8                  | 1.57E-03    | 1.50E-09 | 3.2E-07 | Cldn14        |
| NM_054094                                                                         | 8690.1               | 2.5                  | 2.86E-04    | 2.32E-09 | 4.5E-07 | Acsm1         |
| NR_027641                                                                         | 5776.3               | 23.0                 | 3.97E-03    | 2.42E-09 | 4.7E-07 | Sec16b        |
| NM_001081361                                                                      | 14030.6              | 36.8                 | 2.62E-03    | 2.49E-09 | 4.8E-07 | Mosc1         |
| NM_033354                                                                         | 5776.7               | 23.4                 | 4.05E-03    | 2.55E-09 | 4.9E-07 | Sec16b        |
| NM_001159986                                                                      | 5957.4               | 24.0                 | 4.03E-03    | 2.64E-09 | 4.9E-07 | Sec16b        |
| NM_026152                                                                         | 11318.9              | 43.1                 | 3.80E-03    | 3.25E-09 | 5.9E-07 | Hoga1         |
| NM_007423                                                                         | 9991957.7            | 46011.0              | 4.60E-03    | 3.64E-09 | 6.4E-07 | Afp           |
| NM_001033411                                                                      | 1036.7               | 2.4                  | 2.32E-03    | 4.24E-09 | 7.1E-07 | Gm826         |
| NM_178669                                                                         | 9957.6               | 55.5                 | 5.57E-03    | 4.58E-09 | 7.6E-07 | Clrn3         |
| NM_028078                                                                         | 4126.9               | 19.5                 | 4.73E-03    | 4.64E-09 | 7.6E-07 | Igsf5         |
| NM_001177887                                                                      | 4146.4               | 20.3                 | 4.91E-03    | 5.19E-09 | 8.2E-07 | Igsf5         |
| NM_027819                                                                         | 1023.7               | 3.4                  | 3.34E-03    | 5.24E-09 | 8.2E-07 | Ggt6          |
| NM_001177886                                                                      | 2874.8               | 14.9                 | 5.20E-03    | 5.72E-09 | 8.9E-07 | Igsf5         |
| NM_001127318                                                                      | 9453.8               | 49.3                 | 5.21E-03    | 1.33E-08 | 1.8E-06 | Gucy2c        |
| NM_145067                                                                         | 9182.9               | 48.4                 | 5.27E-03    | 1.34E-08 | 1.8E-06 | Gucy2c        |
| NM_027237                                                                         | 1094.2               | 5.4                  | 4.91E-03    | 1.49E-08 | 2.0E-06 | 2010003K11Rik |
| NM_183094                                                                         | 358.1                | 1.6                  | 4.55E-03    | 1.93E-08 | 2.3E-06 | Xlr4c         |
| NM_172778                                                                         | 53726.9              | 330.3                | 6.15E-03    | 1.97E-08 | 2.4E-06 | Maob          |
| NM_001045539                                                                      | 2567.0               | 22.6                 | 8.82E-03    | 2.26E-08 | 2.6E-06 | Xlr5a         |
| NM_010231                                                                         | 66268.8              | 442.3                | 6.67E-03    | 2.38E-08 | 2.7E-06 | Fmo1          |
| NM_009034                                                                         | 4370.1               | 32.1                 | 7.36E-03    | 2.46E-08 | 2.8E-06 | Rbp2          |
| NM_001033478                                                                      | 361.4                | 1.3                  | 3.59E-03    | 5.03E-08 | 4.9E-06 | Fam47e        |
| NM_016674                                                                         | 14825.9              | 107.0                | 7.21E-03    | 5.32E-08 | 5.1E-06 | Cldn1         |
| NM_029269                                                                         | 121494.5             | 977.6                | 8.05E-03    | 5.74E-08 | 5.4E-06 | Spp2          |
| NM_010189                                                                         | 75629.6              | 501.8                | 6.63E-03    | 5.79E-08 | 5.4E-06 | Fcgrt         |
| NM_019500                                                                         | 299.9                | 0.9                  | 3.13E-03    | 6.37E-08 | 5.8E-06 | Cldn14        |
| NM_001142706                                                                      | 70469.3              | 660.4                | 9.37E-03    | 6.96E-08 | 6.3E-06 | Cfb           |
| NM_008198                                                                         | 70639.6              | 664.3                | 9.40E-03    | 7.04E-08 | 6.3E-06 | Cfb           |
| NM_144512                                                                         | 7948.9               | 36.1                 | 4.54E-03    | 7.22E-08 | 6.4E-06 | Slc6a13       |

|              |          |        |          |          |         |                      |
|--------------|----------|--------|----------|----------|---------|----------------------|
| NM_026656    | 18180.1  | 133.2  | 7.32E-03 | 7.75E-08 | 6.8E-06 | <b>Mcoln2</b>        |
| NM_001005846 | 17459.7  | 129.4  | 7.41E-03 | 7.91E-08 | 6.9E-06 | <b>Mcoln2</b>        |
| NM_001170571 | 327.9    | 1.3    | 3.96E-03 | 8.10E-08 | 7.1E-06 | <b>Fam47e</b>        |
| NM_146020    | 3178.0   | 23.5   | 7.40E-03 | 8.72E-08 | 7.5E-06 | <b>Gltpd2</b>        |
| NM_001081205 | 8813.7   | 70.7   | 8.02E-03 | 9.08E-08 | 7.7E-06 | <b>Nipal1</b>        |
| NM_144878    | 7887.9   | 83.4   | 1.06E-02 | 1.04E-07 | 8.7E-06 | <b>Fmo4</b>          |
| NM_001136237 | 46758.3  | 380.0  | 8.13E-03 | 1.08E-07 | 9.0E-06 | <b>Slc39a5</b>       |
| NM_028092    | 46267.8  | 382.1  | 8.26E-03 | 1.13E-07 | 9.4E-06 | <b>Slc39a5</b>       |
| NM_001110784 | 11600.5  | 116.0  | 1.00E-02 | 1.26E-07 | 1.0E-05 | <b>Xlr3a</b>         |
| NM_028051    | 45038.9  | 387.3  | 8.60E-03 | 1.31E-07 | 1.0E-05 | <b>Slc39a5</b>       |
| NM_001030291 | 634.0    | 5.5    | 8.62E-03 | 1.54E-07 | 1.2E-05 | <b>Enpp7</b>         |
| NM_021332    | 7747.6   | 65.3   | 8.42E-03 | 1.75E-07 | 1.3E-05 | <b>Glp1r</b>         |
| NR_045956    | 644.5    | 6.6    | 1.02E-02 | 1.91E-07 | 1.4E-05 | <b>4930405D11Rik</b> |
| NM_001161621 | 919.8    | 9.6    | 1.04E-02 | 1.91E-07 | 1.4E-05 | <b>Abp1</b>          |
| NM_001161622 | 919.3    | 9.6    | 1.04E-02 | 1.92E-07 | 1.4E-05 | <b>Abp1</b>          |
| NM_013839    | 9752.8   | 88.8   | 9.11E-03 | 1.93E-07 | 1.4E-05 | <b>Nr1h3</b>         |
| NM_001177730 | 9881.9   | 93.3   | 9.44E-03 | 2.01E-07 | 1.4E-05 | <b>Nr1h3</b>         |
| NM_029638    | 956.8    | 10.3   | 1.08E-02 | 2.02E-07 | 1.4E-05 | <b>Abp1</b>          |
| NM_007468    | 376310.0 | 2811.7 | 7.47E-03 | 2.44E-07 | 1.6E-05 | <b>Apoa4</b>         |
| NM_001177467 | 615.1    | 5.5    | 8.94E-03 | 2.51E-07 | 1.7E-05 | <b>Gm7030</b>        |
| NM_001033364 | 48864.7  | 513.4  | 1.05E-02 | 2.67E-07 | 1.7E-05 | <b>Cdhr2</b>         |
| NM_133867    | 11006.6  | 139.4  | 1.27E-02 | 3.02E-07 | 1.9E-05 | <b>Eps8l3</b>        |
| NM_021365    | 761.8    | 8.4    | 1.10E-02 | 3.19E-07 | 2.0E-05 | <b>Xlr4b</b>         |
| NM_001163504 | 4122.2   | 19.2   | 4.67E-03 | 3.29E-07 | 2.1E-05 | <b>Nr1h4</b>         |
| NM_008290    | 18720.2  | 282.1  | 1.51E-02 | 3.46E-07 | 2.1E-05 | <b>Hsd17b2</b>       |
| NM_001161355 | 21363.0  | 261.8  | 1.23E-02 | 3.51E-07 | 2.1E-05 | <b>Timd2</b>         |
| NM_134249    | 20916.9  | 258.8  | 1.24E-02 | 3.63E-07 | 2.2E-05 | <b>Timd2</b>         |
| NM_009108    | 4420.2   | 19.5   | 4.41E-03 | 3.91E-07 | 2.3E-05 | <b>Nr1h4</b>         |
| NM_001161356 | 20583.1  | 258.8  | 1.26E-02 | 3.90E-07 | 2.3E-05 | <b>Timd2</b>         |
| NM_031493    | 180.3    | 0.0    | 0.00E+00 | 4.04E-07 | 2.4E-05 | <b>Xlr5c</b>         |
| NM_001163700 | 4442.4   | 19.5   | 4.38E-03 | 4.14E-07 | 2.4E-05 | <b>Nr1h4</b>         |
| NM_009692    | 416208.1 | 5573.3 | 1.34E-02 | 5.02E-07 | 2.8E-05 | <b>Apoa1</b>         |
| NM_145365    | 16486.5  | 235.5  | 1.43E-02 | 5.66E-07 | 3.0E-05 | <b>Creb3l3</b>       |
| NM_028104    | 2322.3   | 29.0   | 1.25E-02 | 7.97E-07 | 3.9E-05 | <b>Ppp1r14d</b>      |
| NM_011395    | 5161.3   | 78.1   | 1.51E-02 | 8.09E-07 | 4.0E-05 | <b>Slc22a3</b>       |
| NM_010197    | 10717.8  | 159.4  | 1.49E-02 | 8.90E-07 | 4.3E-05 | <b>Fgf1</b>          |
| NM_008670    | 313.8    | 4.5    | 1.42E-02 | 1.12E-06 | 5.1E-05 | <b>Naip1</b>         |
| NM_001195596 | 1589.2   | 24.2   | 1.53E-02 | 1.15E-06 | 5.2E-05 | <b>2010003K15Rik</b> |
| NM_026779    | 10300.4  | 136.5  | 1.32E-02 | 1.40E-06 | 6.1E-05 | <b>Mocos</b>         |
| NM_023219    | 1013.4   | 14.3   | 1.41E-02 | 1.59E-06 | 6.7E-05 | <b>Slc5a4b</b>       |
| NM_175370    | 446.2    | 6.7    | 1.50E-02 | 1.74E-06 | 7.2E-05 | <b>Als2cr12</b>      |
| NM_013474    | 99921.5  | 2074.8 | 2.08E-02 | 1.89E-06 | 7.8E-05 | <b>Apoa2</b>         |
| NM_178257    | 10438.0  | 195.6  | 1.87E-02 | 2.70E-06 | 1.0E-04 | <b>Il22ra1</b>       |
| NM_174846    | 12167.6  | 231.3  | 1.90E-02 | 3.74E-06 | 1.4E-04 | <b>Glyctk</b>        |
| NM_001039586 | 11603.1  | 229.0  | 1.97E-02 | 4.25E-06 | 1.5E-04 | <b>Glyctk</b>        |

|              |         |        |          |          |         |               |
|--------------|---------|--------|----------|----------|---------|---------------|
| NR_045443    | 1258.5  | 34.2   | 2.72E-02 | 4.43E-06 | 1.6E-04 | 1700019B21Rik |
| NM_011367    | 97.1    | 1.7    | 1.79E-02 | 5.62E-06 | 1.9E-04 | Shbg          |
| NR_015596    | 1425.8  | 26.0   | 1.82E-02 | 5.68E-06 | 1.9E-04 | 4930442L01Rik |
| NM_194333    | 5972.1  | 133.4  | 2.23E-02 | 5.75E-06 | 1.9E-04 | Slc23a3       |
| NR_045442    | 1163.1  | 34.0   | 2.92E-02 | 6.08E-06 | 2.0E-04 | 1700019B21Rik |
| NM_001173500 | 2351.5  | 55.0   | 2.34E-02 | 6.74E-06 | 2.2E-04 | G630090E17Rik |
| NM_019432    | 22626.1 | 500.2  | 2.21E-02 | 7.13E-06 | 2.3E-04 | Tmem37        |
| NM_016675    | 22634.4 | 672.1  | 2.97E-02 | 7.12E-06 | 2.3E-04 | Cldn2         |
| NM_172825    | 950.4   | 29.2   | 3.07E-02 | 7.37E-06 | 2.3E-04 | Gpr128        |
| NM_023059    | 17218.7 | 341.7  | 1.98E-02 | 8.18E-06 | 2.5E-04 | Sigirr        |
| NM_001177872 | 2203.9  | 53.5   | 2.43E-02 | 8.99E-06 | 2.7E-04 | Trim15        |
| NM_001144993 | 17566.1 | 415.3  | 2.36E-02 | 9.20E-06 | 2.8E-04 | 2810459M11Rik |
| NM_001144992 | 17569.6 | 415.3  | 2.36E-02 | 9.19E-06 | 2.8E-04 | 2810459M11Rik |
| NM_025806    | 19873.6 | 583.5  | 2.94E-02 | 1.04E-05 | 3.1E-04 | Plbd1         |
| NM_001024134 | 2270.3  | 56.9   | 2.51E-02 | 1.08E-05 | 3.2E-04 | Trim15        |
| NM_001159725 | 9664.2  | 296.5  | 3.07E-02 | 1.17E-05 | 3.4E-04 | Rab17         |
| NM_018816    | 75391.1 | 2018.3 | 2.68E-02 | 1.25E-05 | 3.6E-04 | Apom          |
| NM_008998    | 10844.8 | 333.6  | 3.08E-02 | 1.26E-05 | 3.6E-04 | Rab17         |
| NM_134420    | 7467.1  | 180.6  | 2.42E-02 | 1.43E-05 | 4.0E-04 | Slc26a6       |
| NM_023530    | 14481.4 | 450.4  | 3.11E-02 | 1.67E-05 | 4.5E-04 | Pla2g12b      |
| NM_001161714 | 13108.9 | 377.8  | 2.88E-02 | 2.00E-05 | 5.2E-04 | Tgm1          |
| NM_001161715 | 13149.8 | 381.4  | 2.90E-02 | 2.04E-05 | 5.3E-04 | Tgm1          |
| NM_019984    | 12779.9 | 372.9  | 2.92E-02 | 2.08E-05 | 5.4E-04 | Tgm1          |
| NM_175512    | 3208.6  | 124.8  | 3.89E-02 | 2.08E-05 | 5.4E-04 | Dhrs9         |
| NM_178413    | 22709.1 | 632.4  | 2.78E-02 | 2.55E-05 | 6.4E-04 | Thns12        |
| NM_001033929 | 22610.9 | 630.4  | 2.79E-02 | 2.57E-05 | 6.4E-04 | Thns12        |
| NM_001081642 | 628.5   | 23.9   | 3.80E-02 | 3.28E-05 | 7.8E-04 | Xlr4a         |
| NM_133226    | 5711.1  | 206.9  | 3.62E-02 | 3.76E-05 | 8.6E-04 | Pdzd3         |
| NM_033603    | 26291.7 | 823.1  | 3.13E-02 | 6.11E-05 | 1.3E-03 | Amn           |
| NM_007980    | 2982.8  | 136.2  | 4.57E-02 | 6.16E-05 | 1.3E-03 | Fabp2         |
| NM_029360    | 564.1   | 23.1   | 4.09E-02 | 6.27E-05 | 1.3E-03 | Tm4sf5        |
| NM_172938    | 497.0   | 15.5   | 3.12E-02 | 6.79E-05 | 1.4E-03 | Scml4         |
| NM_001199996 | 66401.4 | 3179.3 | 4.79E-02 | 6.83E-05 | 1.4E-03 | 4933402E13Rik |
| NM_001122660 | 28.3    | 0.3    | 1.18E-02 | 7.22E-05 | 1.5E-03 | Gm10639       |
| NM_001199997 | 67065.0 | 3258.5 | 4.86E-02 | 7.24E-05 | 1.5E-03 | 4933402E13Rik |
| NM_020577    | 15312.0 | 677.6  | 4.43E-02 | 7.98E-05 | 1.6E-03 | As3mt         |
| NM_021291    | 8551.6  | 375.8  | 4.39E-02 | 9.72E-05 | 1.8E-03 | Slc7a9        |
| NM_008125    | 10878.6 | 568.7  | 5.23E-02 | 9.80E-05 | 1.8E-03 | Gjb2          |
| NM_001199016 | 8929.9  | 399.8  | 4.48E-02 | 9.90E-05 | 1.9E-03 | Slc7a9        |
| NM_001199015 | 8980.8  | 411.8  | 4.59E-02 | 1.07E-04 | 2.0E-03 | Slc7a9        |
| NM_001252553 | 39712.2 | 1935.1 | 4.87E-02 | 1.23E-04 | 2.2E-03 | Folr1         |
| NM_001252554 | 39412.8 | 1932.1 | 4.90E-02 | 1.26E-04 | 2.2E-03 | Folr1         |
| NM_001033410 | 1016.6  | 44.5   | 4.38E-02 | 1.27E-04 | 2.3E-03 | Gm757         |
| NM_008034    | 40397.3 | 2010.6 | 4.98E-02 | 1.32E-04 | 2.3E-03 | Folr1         |
| NM_001252552 | 40401.9 | 2010.8 | 4.98E-02 | 1.32E-04 | 2.3E-03 | Folr1         |



| NR_028061                                                                                | 3481.1               | 214.6                | 6.16E-02    | 1.53E-04 | 2.6E-03 | Gm8615        |
|------------------------------------------------------------------------------------------|----------------------|----------------------|-------------|----------|---------|---------------|
| NM_001025384                                                                             | 176.7                | 6.0                  | 3.40E-02    | 2.03E-04 | 3.3E-03 | DXBay18       |
| NM_001025383                                                                             | 175.5                | 6.0                  | 3.42E-02    | 2.08E-04 | 3.3E-03 | Gm14685       |
| NM_001193309                                                                             | 92799.0              | 5482.0               | 5.91E-02    | 2.14E-04 | 3.4E-03 | Morc4         |
| NM_029413                                                                                | 93614.4              | 5550.6               | 5.93E-02    | 2.17E-04 | 3.4E-03 | Morc4         |
| NM_001113385                                                                             | 5761.0               | 2.9                  | 5.02E-04    | 2.42E-04 | 3.7E-03 | BC021785      |
| NM_008261                                                                                | 42486.2              | 2510.2               | 5.91E-02    | 2.65E-04 | 4.0E-03 | Hnf4a         |
| NM_009695                                                                                | 35258.2              | 2733.0               | 7.75E-02    | 3.81E-04 | 5.3E-03 | Apoc2         |
| NM_021517                                                                                | 43510.2              | 711.7                | 1.64E-02    | 4.54E-04 | 6.1E-03 | Pdzk1         |
| NM_029494                                                                                | 5723.1               | 390.3                | 6.82E-02    | 4.57E-04 | 6.1E-03 | Rab30         |
| NM_001201390                                                                             | 108.3                | 7.1                  | 6.60E-02    | 4.73E-04 | 6.3E-03 | E330021D16Rik |
| NM_008221                                                                                | 20344.1              | 1209.8               | 5.95E-02    | 5.43E-04 | 7.1E-03 | Hbb-y         |
| NM_026680                                                                                | 1908.0               | 129.6                | 6.79E-02    | 5.52E-04 | 7.1E-03 | Golt1a        |
| NM_001146001                                                                             | 42297.2              | 697.9                | 1.65E-02    | 5.77E-04 | 7.4E-03 | Pdzk1         |
| NM_025572                                                                                | 7495.7               | 467.7                | 6.24E-02    | 6.23E-04 | 7.8E-03 | 2610528J11Rik |
| NM_001033423                                                                             | 688.1                | 0.7                  | 1.03E-03    | 6.38E-04 | 8.0E-03 | Gm773         |
| NM_001081084                                                                             | 239835.8             | 19847.4              | 8.28E-02    | 6.68E-04 | 8.3E-03 | Cubn          |
| NM_001001489                                                                             | 3911.3               | 2.9                  | 7.40E-04    | 9.47E-04 | 1.1E-02 | BC021785      |
| NM_001033185                                                                             | 259.9                | 17.7                 | 6.81E-02    | 1.03E-03 | 1.2E-02 | 1700084C01Rik |
| NM_011683                                                                                | 29.3                 | 0.0                  | Inf         | 1.27E-03 | 1.4E-02 | Vmn1r51       |
| NM_001025384_2                                                                           | 166.8                | 10.8                 | 6.50E-02    | 1.42E-03 | 1.5E-02 | DXBay18       |
| NM_001025383_2                                                                           | 166.0                | 10.8                 | 6.53E-02    | 1.45E-03 | 1.5E-02 | Gm14685       |
| NM_001113388                                                                             | 2387.8               | 40.3                 | 1.69E-02    | 2.54E-03 | 2.4E-02 | BC021785      |
| NR_015519                                                                                | 201.4                | 15.4                 | 7.63E-02    | 3.14E-03 | 2.8E-02 | AI662270      |
| NM_001085529                                                                             | 166.6                | 8.8                  | 5.26E-02    | 3.41E-03 | 3.0E-02 | Slc2a7        |
| NR_033324                                                                                | 12008.0              | 1521.5               | 1.27E-01    | 3.73E-03 | 3.2E-02 | BC065397      |
| <b>Genes expressed differentially higher in cystic EBs than in E12.5 ysE (118 genes)</b> |                      |                      |             |          |         |               |
| gene name                                                                                | ysE mean read counts | EBs mean read counts | fold change | P val    | padj    | gene name     |
| NM_080728                                                                                | 0.7                  | 7993.8               | 1.13E+04    | 1.53E-18 | 4.3E-14 | Myh7          |
| NM_008440                                                                                | 7.9                  | 7454.2               | 9.39E+02    | 8.15E-15 | 3.3E-11 | Kif1a         |
| NM_001110315                                                                             | 7.9                  | 7453.5               | 9.39E+02    | 8.16E-15 | 3.3E-11 | Kif1a         |
| NM_021459                                                                                | 0.0                  | 932.7                | Inf         | 9.10E-14 | 2.0E-10 | Isl1          |
| NM_011443                                                                                | 10.0                 | 6823.1               | 6.85E+02    | 7.62E-14 | 2.0E-10 | Sox2          |
| NM_133197                                                                                | 1.1                  | 987.8                | 9.26E+02    | 9.52E-14 | 2.0E-10 | Mcf2          |
| NM_010910                                                                                | 1.7                  | 1601.0               | 9.64E+02    | 4.30E-13 | 8.0E-10 | Nefl          |
| NM_025274                                                                                | 9.9                  | 4917.1               | 4.99E+02    | 6.23E-13 | 1.1E-09 | Dppa5a        |
| NM_001080814                                                                             | 5.2                  | 2425.5               | 4.63E+02    | 4.30E-12 | 6.0E-09 | Fat3          |
| NM_022879                                                                                | 0.9                  | 2877.9               | 3.26E+03    | 5.30E-12 | 7.1E-09 | Myl7          |
| NR_033497                                                                                | 0.0                  | 239.8                | Inf         | 7.10E-12 | 7.8E-09 | D830015G02Rik |
| NM_172399                                                                                | 0.0                  | 311.8                | Inf         | 7.22E-12 | 7.8E-09 | A930038C07Rik |
| NM_007430                                                                                | 0.0                  | 576.6                | Inf         | 8.98E-12 | 8.7E-09 | Nr0b1         |
| NM_001081281                                                                             | 0.0                  | 202.8                | Inf         | 2.21E-11 | 1.7E-08 | Trim55        |
| NM_011889                                                                                | 1.8                  | 808.3                | 4.42E+02    | 3.06E-11 | 2.2E-08 | Sep-03        |
| NM_010112                                                                                | 4.2                  | 1290.7               | 3.08E+02    | 4.00E-11 | 2.3E-08 | Efs           |

|              |       |         |          |          |         |                      |
|--------------|-------|---------|----------|----------|---------|----------------------|
| NM_008671    | 0.5   | 350.1   | 6.56E+02 | 3.87E-11 | 2.3E-08 | <b>Nap112</b>        |
| NM_023396    | 1.5   | 577.5   | 3.80E+02 | 7.68E-11 | 3.9E-08 | <b>Rprm</b>          |
| NM_010703    | 0.7   | 385.4   | 5.43E+02 | 1.05E-10 | 4.7E-08 | <b>Lef1</b>          |
| NM_001198565 | 48.5  | 9107.2  | 1.88E+02 | 1.21E-10 | 5.3E-08 | <b>Sulf1</b>         |
| NM_001198566 | 48.2  | 8910.6  | 1.85E+02 | 1.34E-10 | 5.5E-08 | <b>Sulf1</b>         |
| NM_172294    | 47.9  | 8545.0  | 1.78E+02 | 1.57E-10 | 6.3E-08 | <b>Sulf1</b>         |
| NM_009994    | 3.2   | 800.3   | 2.52E+02 | 1.99E-10 | 7.6E-08 | <b>Cyp1b1</b>        |
| NM_009189    | 0.7   | 333.1   | 4.70E+02 | 2.14E-10 | 8.0E-08 | <b>Six1</b>          |
| NM_028351    | 3.7   | 890.3   | 2.42E+02 | 2.20E-10 | 8.0E-08 | <b>Rspo3</b>         |
| NM_178394    | 1.1   | 415.9   | 3.92E+02 | 2.21E-10 | 8.0E-08 | <b>Jakmip1</b>       |
| NM_172430    | 2.1   | 613.2   | 2.85E+02 | 2.25E-10 | 8.1E-08 | <b>Sphkap</b>        |
| NR_002874    | 0.0   | 521.5   | Inf      | 2.37E-10 | 8.3E-08 | <b>Has2as</b>        |
| NM_001113181 | 0.9   | 289.0   | 3.36E+02 | 2.79E-10 | 9.4E-08 | <b>Gria4</b>         |
| NM_009865    | 0.0   | 156.9   | Inf      | 2.97E-10 | 9.9E-08 | <b>Cdh10</b>         |
| NM_011382    | 14.3  | 2394.2  | 1.67E+02 | 3.77E-10 | 1.2E-07 | <b>Six4</b>          |
| NM_009911    | 5.3   | 1119.0  | 2.11E+02 | 4.03E-10 | 1.2E-07 | <b>Cxcr4</b>         |
| NM_145123    | 0.0   | 145.1   | Inf      | 4.45E-10 | 1.3E-07 | <b>Crtac1</b>        |
| NM_001077354 | 4.3   | 851.5   | 1.96E+02 | 5.50E-10 | 1.6E-07 | <b>C77370</b>        |
| NM_028882    | 5.0   | 858.0   | 1.71E+02 | 6.30E-10 | 1.7E-07 | <b>Sema3d</b>        |
| NM_018741    | 0.0   | 135.4   | Inf      | 7.33E-10 | 1.9E-07 | <b>Igfbp1</b>        |
| NM_025285    | 3.5   | 1680.4  | 4.77E+02 | 8.27E-10 | 2.0E-07 | <b>Stmn2</b>         |
| NM_008108    | 1.9   | 372.6   | 1.95E+02 | 8.82E-10 | 2.2E-07 | <b>Gdf3</b>          |
| NM_183171    | 2.4   | 503.7   | 2.12E+02 | 1.44E-09 | 3.2E-07 | <b>Fez1</b>          |
| NM_019691    | 2.0   | 372.6   | 1.82E+02 | 2.10E-09 | 4.3E-07 | <b>Gria4</b>         |
| NM_001113180 | 2.0   | 370.7   | 1.81E+02 | 2.16E-09 | 4.3E-07 | <b>Gria4</b>         |
| NM_198865    | 0.5   | 179.3   | 3.49E+02 | 2.59E-09 | 4.9E-07 | <b>Slitrk5</b>       |
| NM_007603    | 44.0  | 5718.2  | 1.30E+02 | 2.69E-09 | 5.0E-07 | <b>Capn6</b>         |
| NM_001204371 | 0.0   | 111.3   | Inf      | 3.03E-09 | 5.6E-07 | <b>Oprk1</b>         |
| NM_011011    | 0.0   | 110.3   | Inf      | 3.21E-09 | 5.8E-07 | <b>Oprk1</b>         |
| NM_008800    | 6.1   | 762.7   | 1.25E+02 | 3.31E-09 | 5.9E-07 | <b>Pdel1b</b>        |
| NM_019784    | 0.0   | 103.2   | Inf      | 6.09E-09 | 9.2E-07 | <b>Tex21</b>         |
| NM_028472    | 9.6   | 1232.6  | 1.29E+02 | 6.18E-09 | 9.3E-07 | <b>Bmper</b>         |
| NM_030708    | 11.4  | 1384.5  | 1.22E+02 | 6.35E-09 | 9.5E-07 | <b>Zfhx4</b>         |
| NM_001159532 | 0.0   | 102.2   | Inf      | 6.49E-09 | 9.7E-07 | <b>Tex21</b>         |
| NM_007960    | 4.3   | 501.5   | 1.17E+02 | 8.23E-09 | 1.2E-06 | <b>Etv1</b>          |
| NM_001163154 | 3.4   | 383.3   | 1.14E+02 | 1.03E-08 | 1.4E-06 | <b>Etv1</b>          |
| NM_008741    | 1.9   | 298.2   | 1.56E+02 | 1.07E-08 | 1.5E-06 | <b>Nsg2</b>          |
| NM_001164504 | 2.2   | 319.8   | 1.49E+02 | 1.40E-08 | 1.8E-06 | <b>Rnf165</b>        |
| NM_172706    | 2.1   | 172.5   | 8.08E+01 | 1.60E-08 | 2.1E-06 | <b>9330182L06Rik</b> |
| NM_009234    | 159.9 | 13493.0 | 8.44E+01 | 1.79E-08 | 2.2E-06 | <b>Sox11</b>         |
| NM_175432    | 22.5  | 2106.4  | 9.36E+01 | 2.13E-08 | 2.5E-06 | <b>Tmem132c</b>      |
| NM_023872    | 4.6   | 561.7   | 1.21E+02 | 3.07E-08 | 3.3E-06 | <b>Kcnq5</b>         |
| NM_001160139 | 4.6   | 561.7   | 1.21E+02 | 3.07E-08 | 3.3E-06 | <b>Kcnq5</b>         |
| NM_053144    | 1.2   | 179.0   | 1.52E+02 | 3.29E-08 | 3.5E-06 | <b>Pcdhb19</b>       |
| NM_010425    | 1.9   | 171.1   | 8.81E+01 | 3.78E-08 | 3.9E-06 | <b>Foxd3</b>         |

|              |      |        |          |          |         |                      |
|--------------|------|--------|----------|----------|---------|----------------------|
| NM_001081009 | 8.3  | 712.3  | 8.63E+01 | 4.07E-08 | 4.1E-06 | <b>Parp8</b>         |
| NM_183177    | 3.4  | 331.9  | 9.64E+01 | 4.55E-08 | 4.5E-06 | <b>Zfp811</b>        |
| NM_025681    | 3.0  | 318.8  | 1.05E+02 | 4.88E-08 | 4.8E-06 | <b>Lix1</b>          |
| NR_028107    | 0.0  | 67.0   | Inf      | 5.17E-08 | 5.0E-06 | <b>1700058G18Rik</b> |
| NM_010059    | 4.9  | 454.9  | 9.30E+01 | 5.17E-08 | 5.0E-06 | <b>Dmc1</b>          |
| NM_021452    | 1.6  | 148.3  | 9.04E+01 | 5.99E-08 | 5.6E-06 | <b>Kcnmb4</b>        |
| NR_015595    | 0.3  | 98.4   | 3.35E+02 | 8.25E-08 | 7.2E-06 | <b>2410137F16Rik</b> |
| NM_133189    | 1.6  | 107.2  | 6.70E+01 | 8.71E-08 | 7.5E-06 | <b>Cacng7</b>        |
| NM_182809    | 0.0  | 50.2   | Inf      | 9.03E-08 | 7.7E-06 | <b>Ntrk3</b>         |
| NM_053146    | 0.5  | 109.0  | 2.31E+02 | 9.15E-08 | 7.8E-06 | <b>Pcdhb21</b>       |
| NM_013904    | 7.3  | 603.8  | 8.23E+01 | 9.39E-08 | 7.9E-06 | <b>Hey2</b>          |
| NM_009152    | 14.5 | 1043.2 | 7.19E+01 | 1.10E-07 | 9.2E-06 | <b>Sema3a</b>        |
| NM_001159648 | 1.7  | 155.6  | 9.29E+01 | 1.41E-07 | 1.1E-05 | <b>Cntn1</b>         |
| NM_001243073 | 14.5 | 991.7  | 6.83E+01 | 1.49E-07 | 1.2E-05 | <b>Sema3a</b>        |
| NM_001243072 | 14.5 | 990.9  | 6.83E+01 | 1.50E-07 | 1.2E-05 | <b>Sema3a</b>        |
| NM_053242    | 4.6  | 341.4  | 7.39E+01 | 1.62E-07 | 1.2E-05 | <b>Foxp2</b>         |
| NM_007727    | 1.7  | 149.1  | 8.90E+01 | 1.74E-07 | 1.3E-05 | <b>Cntn1</b>         |
| NM_026380    | 0.0  | 49.6   | Inf      | 1.76E-07 | 1.3E-05 | <b>Rgs8</b>          |
| NM_001159647 | 1.7  | 148.0  | 8.84E+01 | 1.80E-07 | 1.3E-05 | <b>Cntn1</b>         |
| NM_175549    | 37.6 | 2425.6 | 6.44E+01 | 2.35E-07 | 1.6E-05 | <b>Robo2</b>         |
| NM_010259    | 5.2  | 355.6  | 6.80E+01 | 3.09E-07 | 2.0E-05 | <b>Gbp1</b>          |
| NM_212435    | 4.6  | 299.6  | 6.49E+01 | 3.32E-07 | 2.1E-05 | <b>Foxp2</b>         |
| NM_010298    | 5.2  | 301.0  | 5.81E+01 | 3.79E-07 | 2.2E-05 | <b>Glr3</b>          |
| NM_008746    | 0.0  | 38.5   | Inf      | 4.16E-07 | 2.4E-05 | <b>Ntrk3</b>         |
| NM_011824    | 0.3  | 75.6   | 2.63E+02 | 4.22E-07 | 2.4E-05 | <b>Grem1</b>         |
| NM_053142    | 2.6  | 203.1  | 7.87E+01 | 4.75E-07 | 2.7E-05 | <b>Pcdhb17</b>       |
| NM_001163691 | 16.1 | 712.2  | 4.43E+01 | 6.28E-07 | 3.2E-05 | <b>Cacna1h</b>       |
| NM_001033408 | 5.8  | 327.4  | 5.62E+01 | 6.63E-07 | 3.3E-05 | <b>Rbm44</b>         |
| NM_021415    | 16.3 | 716.0  | 4.39E+01 | 6.66E-07 | 3.3E-05 | <b>Cacna1h</b>       |
| NM_009182    | 1.9  | 123.9  | 6.42E+01 | 7.32E-07 | 3.6E-05 | <b>St8sia3</b>       |
| NM_001160371 | 0.6  | 295.6  | 5.03E+02 | 9.57E-07 | 4.5E-05 | <b>A830018L16Rik</b> |
| NM_016663    | 0.0  | 29.4   | Inf      | 9.50E-07 | 4.5E-05 | <b>Syt3</b>          |
| NM_001160370 | 0.6  | 306.4  | 5.21E+02 | 9.74E-07 | 4.6E-05 | <b>A830018L16Rik</b> |
| NM_001114116 | 0.0  | 29.3   | Inf      | 9.80E-07 | 4.6E-05 | <b>Syt3</b>          |
| NR_045053    | 10.6 | 480.0  | 4.53E+01 | 1.12E-06 | 5.1E-05 | <b>2610307P16Rik</b> |
| NM_009062    | 7.3  | 306.8  | 4.18E+01 | 1.39E-06 | 6.1E-05 | <b>Rgs4</b>          |
| NR_045054    | 12.0 | 499.5  | 4.16E+01 | 1.46E-06 | 6.3E-05 | <b>2610307P16Rik</b> |
| NM_018800    | 0.6  | 57.1   | 9.71E+01 | 2.54E-06 | 9.9E-05 | <b>Syt6</b>          |
| NM_007664    | 84.2 | 2930.5 | 3.48E+01 | 3.23E-06 | 1.2E-04 | <b>Cdh2</b>          |
| NM_001190352 | 1.0  | 100.5  | 9.60E+01 | 3.78E-06 | 1.4E-04 | <b>Tmem132b</b>      |
| NM_001081388 | 0.5  | 53.7   | 1.05E+02 | 3.78E-06 | 1.4E-04 | <b>Rimbp2</b>        |
| NM_198863    | 2.9  | 125.5  | 4.26E+01 | 4.60E-06 | 1.6E-04 | <b>Slitrk2</b>       |
| NM_001161431 | 2.9  | 123.4  | 4.19E+01 | 4.90E-06 | 1.7E-04 | <b>Slitrk2</b>       |
| NM_010861    | 1.1  | 245.5  | 2.14E+02 | 5.12E-06 | 1.8E-04 | <b>Myl2</b>          |
| NR_015455    | 1.1  | 65.0   | 6.05E+01 | 5.51E-06 | 1.9E-04 | <b>BC064078</b>      |

|                     |      |       |          |          |         |                      |
|---------------------|------|-------|----------|----------|---------|----------------------|
| <b>NM_177615</b>    | 11.2 | 343.5 | 3.06E+01 | 1.32E-05 | 3.8E-04 | <b>Slc26a10</b>      |
| <b>NM_001085521</b> | 2.1  | 77.1  | 3.63E+01 | 2.13E-05 | 5.5E-04 | <b>Tmem90b</b>       |
| <b>NM_013540</b>    | 6.7  | 198.3 | 2.97E+01 | 2.96E-05 | 7.2E-04 | <b>Gria2</b>         |
| <b>NM_001083806</b> | 6.7  | 196.9 | 2.95E+01 | 3.04E-05 | 7.4E-04 | <b>Gria2</b>         |
| <b>NM_001160369</b> | 4.5  | 202.8 | 4.55E+01 | 5.22E-05 | 1.1E-03 | <b>A830018L16Rik</b> |
| <b>NM_177173</b>    | 4.5  | 202.5 | 4.55E+01 | 5.49E-05 | 1.2E-03 | <b>A830018L16Rik</b> |
| <b>NM_001039195</b> | 6.2  | 155.5 | 2.52E+01 | 6.72E-05 | 1.4E-03 | <b>Gria2</b>         |
| <b>NM_009144</b>    | 22.3 | 390.2 | 1.75E+01 | 9.96E-05 | 1.9E-03 | <b>Sfrp2</b>         |
| <b>NM_007831</b>    | 1.9  | 48.4  | 2.60E+01 | 1.48E-04 | 2.5E-03 | <b>Dcc</b>           |
| <b>NM_175506</b>    | 15.2 | 261.4 | 1.72E+01 | 1.72E-04 | 2.9E-03 | <b>Adamts19</b>      |
| <b>NM_010140</b>    | 21.4 | 241.2 | 1.13E+01 | 1.76E-03 | 1.8E-02 | <b>Epha3</b>         |
| <b>NM_010816</b>    | 72.7 | 607.2 | 8.36E+00 | 2.92E-03 | 2.6E-02 | <b>Morc1</b>         |

Genes showing no significant differential expression between E9.25 and E12.5 ysE and no significant differential expression between cystic EBs and E12.5 fetal liver, that are significantly differentially expressed between ysE and cystic EBs/fetal liver (Fig. 5B, Fig. S5E, 272 genes, 156 genes higher in ysE, 118 genes higher in cystic EBs/fetal liver). Values for E12.5 ysE vs. cystic EBs are displayed calculated using the DESeq package from BioConductor.

Key: P val =  $p$  value, padj =  $p$  value adjusted with the Benjamini-Hochberg procedure, Inf = infinite fold change.

**Table S2. ES cell media for deriving new ES cell lines**

| SR-ES Medium                      |              | ES Medium                         |              |
|-----------------------------------|--------------|-----------------------------------|--------------|
| DMEM (Gibco, cat.nr: 12430)       | 500ml        | DMEM (Gibco, cat.nr: 12430)       | 500ml        |
| KO-Serum (Gibco, cat.nr: 10828)   | 100ml        | FCS (Gibco, cat.nr: 10270-106)    | 100ml        |
| Non-essential amino acids (100x)  | 6ml          | Non-essential amino acids (100x)  | 6ml          |
| Penicillin/Streptomycin (100x)    | 6ml          | Penicillin/Streptomycin (100x)    | 6ml          |
| Natrium-Pyruvat (100x)            | 6ml          | Natrium-Pyruvat (100x)            | 6ml          |
| L-Glutamine (100x)                | 6ml          | L-Glutamine (100x)                | 6ml          |
| $\beta$ -Mercaptoethanol (55mmol) | 1092 $\mu$ l | $\beta$ -Mercaptoethanol (55mmol) | 1092 $\mu$ l |
| LIF (Millipore, cat.nr: ESG1107)  | 120 $\mu$ l  | LIF (Millipore, cat.nr: ESG1107)  | 120 $\mu$ l  |

**Table S3. Primer sequences**

| Primers for RT-PCR reactions (Fig. 1D-F) and whole mount <i>in situ</i> probes (*, Fig. 1G-H, Fig. S1) |                           |                            |
|--------------------------------------------------------------------------------------------------------|---------------------------|----------------------------|
| Gene                                                                                                   | Forward                   | Reverse                    |
| Actb                                                                                                   | CCACCATGTACCCAGGCATT      | AGGGTGTA AAAACGCAGCTCA     |
| Afp*                                                                                                   | AGAGAATGGCGTCAAACCTG      | GGCTTTCCTCGTGTAACCAA       |
| Amn                                                                                                    | CAGGAGGCGACTCGGACCCA      | CACTGCCGAGACGCTGCGAA       |
| Gata4                                                                                                  | CAGCCCAGTCCTGCACAGCC      | GGGCCGGTTGATGCCGTTCA       |
| Hnf4a                                                                                                  | GGAGGAGGCAGGAGGAGGGC      | ATGGCGCACAGGGCACTGAC       |
| Ins2                                                                                                   | CCATCAGCAAGCAGGAAGGT      | GCTGGTGCAGCACTGATCTA       |
| Lefty1*                                                                                                | GACCC TTCAGGACACCTCAG     | TGTGTGGGGACAGCCTCTTT       |
| Mixl1                                                                                                  | TGCTCCTGGGACTGAAGCTA      | CAACGCTCCCAGAATCCTCA       |
| Pyy*                                                                                                   | TAATCCTGCTCGCCTGTCTG      | TTCACCACTGGTCCAAACCT       |
| Slc22a2                                                                                                | AGAGTCGTCCTGAGCTGACC      | AACTCAGTGACGATGGAGGAG      |
| Slc22a3                                                                                                | ACTCACTGCCTTCCCCAAC       | AGAGATGGCTAGCTGGATGC       |
| Sox17                                                                                                  | GGAGGGAGGGTCACCACTGCT     | CTATGGCCACGGGACACGCC       |
| Sox7                                                                                                   | CTGTCCGGATGGGCTGTCGCC     | TTCTTCCTGCGGGGCCGGTA       |
| Tfpi2                                                                                                  | TTTGCCGCTGCTCCTGGTGG      | TGGCATTGCCCAAGCAGCCT       |
| Ttr*                                                                                                   | AGACCTCTGAGGGATCCTGG      | ATGGGATGCTACTGCTTTGG       |
| Primers used for Sanger sequencing RT-PCR amplicons (Fig.2C,D; Fig.S2)                                 |                           |                            |
| Gene                                                                                                   | Forward                   | Reverse                    |
| Airm                                                                                                   | TGCAGAAAAATGGCTCTGTTCTTA  | ACCGTAACAGTTTCACCTACGA     |
| Cd81                                                                                                   | AGCTGTCATTATGATCTTTGAGATG | AATGGAGGCAGGAAAGGAACA      |
| Cdknc1                                                                                                 | CAGGGTGTCCCTCTCCAAAC      | TTTACACCTTGGGACCAGCG       |
| Igf2                                                                                                   | GGGGGTGTCAATTGGGTTGT      | CCTCTTCGGAGATGTCCAGC       |
| Igf2r                                                                                                  | TCAGCAGGAAAGTAGGCACC      | GACTCCGCTCTGAGAGTCCT       |
| Kcnq1ot1                                                                                               | CCAGACCCGATTCGGTTTCA      | GGCCAGAAGCAGAGGTGATT       |
| Osbp15                                                                                                 | TTCTCTCTACGGACTGCCCA      | GAAGTCTCGTCCAGCTCTCC       |
| Peg10                                                                                                  | TCCACCCATTTGTCTGCCAT      | GGCCTGCCTCTTTCATCTCC       |
| Pon2                                                                                                   | CTCAAGTTTCCAGGGCTCCA      | CATCTATGAAAGTGCTAATGCCATGT |
| Ppp1r9a                                                                                                | AAGTCTGCCCTGCCTGTAAC      | TTTGTTTCCACACCGGACCA       |
| Sfmbt2<br>(Cast x FVB)                                                                                 | CGCAGAGGAGGACGTGTTGCC     | CTGGAGGGCGCTGGCACTTC       |
| Sfmbt2<br>(Bl6 x 129)                                                                                  | AATGGAAATGCCACCTCAAC      | CGTCTGAAGATGGCAGTGAA       |
| Slc22a3<br>(Cast x FVB,<br>Bl6 x 129)                                                                  | ACTCACTGCCTTCCCCAAC       | AGAGATGGCTAGCTGGATGC       |
| Tssc4                                                                                                  | GAGGCTGAGGAATGGAGTGG      | TCCTAAACTGGGGCACAA         |

**Table S4. Samples sequenced by RNA-seq, WGBS and ChIP-seq.**

| <b>RNA-seq</b>            |       |                  |     |                    |                  |                      |
|---------------------------|-------|------------------|-----|--------------------|------------------|----------------------|
| Sample information        |       |                  |     |                    |                  |                      |
| Sample                    | Stage | Genotype         | Sex | Seq. depth (reads) | Read type        | Library prep. Method |
| Yolk sac endoderm (br.1)  | E12.5 | FVB/N            | M+F | 77,019,807         | 51bp Single End  | (Huang et al 2011)   |
| Yolk sac endoderm (br.2)* | E12.5 | F1 CAST/FVB      | M+F | 50,858,688         | 101bp Paired End | (Sultan et al 2012)  |
| Yolk sac endoderm (br.3)* | E12.5 | F1 CAST/FVB      | M+F | 53,269,491         | 101bp Paired End | (Sultan et al 2012)  |
| Yolk sac endoderm (br.4)* | E12.5 | F1 CAST/FVB      | M+F | 58,680,944         | 101bp Paired End | (Sultan et al 2012)  |
| Yolk sac endoderm (br.5)* | E12.5 | F1 CAST/FVB      | M+F | 53,202,468         | 101bp Paired End | (Sultan et al 2012)  |
| Yolk sac endoderm (br.1)  | E9.25 | FVB/N            | M+F | 63,805,819         | 101bp Paired End | (Sultan et al 2012)  |
| Yolk sac endoderm (br.2)  | E9.25 | FVB/N            | M+F | 103,262,624        | 101bp Paired End | (Sultan et al 2012)  |
| Yolk sac mesoderm (br.1)  | E9.25 | FVB/N            | M+F | 69,322,057         | 101bp Paired End | (Sultan et al 2012)  |
| Yolk sac mesoderm (br.2)  | E9.25 | FVB/N            | M+F | 71,521,422         | 101bp Paired End | (Sultan et al 2012)  |
| Fetal liver (br.1)*       | E12.5 | F1 CAST/FVB      | M+F | 51,077,974         | 101bp Paired End | (Sultan et al 2012)  |
| Fetal liver (br.2)*       | E12.5 | F1 CAST/FVB      | M+F | 56,585,937         | 101bp Paired End | (Sultan et al 2012)  |
| Fetal liver (br.3)*       | E12.5 | F1 CAST/FVB      | M+F | 52,303,488         | 101bp Paired End | (Sultan et al 2012)  |
| Fetal liver (br.4)*       | E12.5 | F1 CAST/FVB      | M+F | 52,061,503         | 101bp Paired End | (Sultan et al 2012)  |
| Fetal liver (br.5)        | E12.5 | FVB/N            | M+F | 67,562,979         | 101bp Paired End | ScriptSeq v1         |
| Fetal liver (br.6)        | E12.5 | FVB/N            | M+F | 48,766,733         | 101bp Paired End | ScriptSeq v1         |
| Cystic EBs (A9, br.1)     | d10   | C57BL/6 x 129    | F   | 126,715,112        | 51bp Single End  | ScriptSeq v1         |
| Cystic EBs (JN, br.2)     | d10   | C57BL/6 x 129    | M   | 61,201,370         | 101bp Paired End | (Sultan et al 2012)  |
| Cystic EBs (A9, br.1)     | d15   | C57BL/6 x 129    | F   | 122,826,880        | 51bp Single End  | ScriptSeq v1         |
| Cystic EBs (JN, br.2)     | d15   | C57BL/6 x 129    | M   | 68,175,994         | 101bp Paired End | (Sultan et al 2012)  |
| <b>WGBS</b>               |       |                  |     |                    |                  |                      |
| Sample information        |       |                  |     |                    |                  |                      |
| Sample                    | Stage | Genotype         | Sex | Seq. depth (reads) | Read type        | Library prep. Method |
| Yolk sac endoderm         | E12.5 | CAST/EiJ x FVB/N | M+F | 152,951,808        | 101bp Paired End | TruSeq v2            |
| Yolk sac endoderm         | E12.5 | FVB/N x CAST/EiJ | M+F | 56,573,815         | 101bp Paired End | TruSeq v2            |
| Fetal liver               | E12.5 | CAST/EiJ x FVB/N | M+F | 88,378,228         | 101bp Paired End | TruSeq v2            |
| Fetal liver               | E12.5 | FVB/N x CAST/EiJ | M+F | 87,382,218         | 101bp Paired End | TruSeq v2            |
| Cystic EBs (CF-C2)        | d15   | CAST/EiJ x FVB/N | M   | 83,240,691         | 101bp Paired End | TruSeq v2            |
| Cystic EBs (FC-A2)        | d15   | FVB/N x CAST/EiJ | M   | 41,643,829         | 101bp Paired End | TruSeq v2            |
| <b>ChIP-seq</b>           |       |                  |     |                    |                  |                      |
| Sample information        |       |                  |     |                    |                  |                      |
| Sample                    | Stage | Genotype         | Sex | Seq. depth (reads) | Read type        | Library prep. Method |
| VYS H3K4me3 ChIP          | E12.5 | FVB/N            | M+F | 13,858,725         | 51bp Single End  | TruSeq ChIP          |
| VYS input                 | E12.5 | FVB/N            | M+F | 30,163,909         | 51bp Single End  | TruSeq ChIP          |

Maternal allele written on left except for E12.5 ysE and fetal liver F1 CAST/FVB crosses for RNA-seq (\*) where the direction of the cross is not indicated.

Sequences submitted to GEO (GSE56276) except for extra biological replicates (\*) that will be submitted together with a manuscript currently in preparation (DA & QJH et al) surveying imprinted expression in multiple tissues.

Key: Sample: br = biological replicate, ES cell clone name specified. Sex = male (M), female (F).
